# Supplementary material
Source: PubMed Central journal article supplement (PMC2780739)
Supplement: 0906966106_ST1_PDF.pdf [file 0906966106_ST1_PDF.pdf]

Table S1. Comparative analysis of the EROS (1, 2) and two Backrub ensembles (4)

|                    |              |    |               |               |       |      | $\delta$ value | p-value median | p-value average | % of structures with p-value < 0.1 |          |       |       |
|--------------------|--------------|----|---------------|---------------|-------|------|----------------|----------------|-----------------|------------------------------------|----------|-------|-------|
|                    |              |    |               |               |       |      |                |                |                 | RMSD 0.5 Å                         | RMSD 25Å | 0.5 Å | 1.5 Å |
| <b>EROS</b>        | without tail | bb | 0.78 +/- 0.22 | 0.60 +/- 0.05 | 30 %  | 0.29 | 3.5667e-09     | 33,00%         | 53,00%          | 53,00%                             | 37,00%   |       |       |
|                    |              | sc | 2.00 +/- 0.38 | 1.42 +/- 0.08 | 41 %  | 0.06 | < 2.2e-16      | 61,00%         | 79,00%          | 74,00%                             | 42,00%   |       |       |
|                    | with tail    | bb | 1.41 +/- 0.79 | 0.79 +/- 0.17 | 78 %  | 0.04 | < 2.2e-16      | 72,00%         | 74,00%          | 47,00%                             | 53,00%   |       |       |
|                    |              | sc | 2.58 +/- 1.00 | 1.67 +/- 0.20 | 54 %  | 0.07 | < 2.2e-16      | 63,00%         | 68,00%          | 68,00%                             | 63,00%   |       |       |
| <b>BACKRUB 1.2</b> | without tail | bb | 0.76 +/- 0.23 | 0.67 +/- 0.07 | 13 %  | 0.52 | 0.42           | 28,00%         | 47,00%          | 37,00%                             | 31,00%   |       |       |
|                    |              | sc | 2.01 +/- 0.38 | 1.56 +/- 0.12 | 29 %  | 0.18 | 4.1660e-10     | 28,00%         | 21,00%          | 21,00%                             | 31,00%   |       |       |
|                    | with tail    | bb | 1.98 +/- 2.12 | 0.85 +/- 0.26 | 133 % | 0.18 | < 2.2e-16      | 44,00%         | 58,00%          | 58,00%                             | 37,00%   |       |       |
|                    |              | sc | 2.28 +/- 0.51 | 1.73 +/- 0.18 | 32 %  | 0.09 | < 2.2e-16      | 53,00%         | 53,00%          | 53,00%                             | 47,00%   |       |       |
| <b>BACKRUB 2.4</b> | without tail | bb | 0.65 +/- 0.29 | 0.57 +/- 0.09 | 14 %  | 0.29 | 0.03           | 27,00%         | 42,00%          | 37,00%                             | 31,00%   |       |       |
|                    |              | sc | 2.02 +/- 0.45 | 1.51 +/- 0.12 | 34 %  | 0.10 | 8.2635e-10     | 50,00%         | 42,00%          | 37,00%                             | 26,00%   |       |       |
|                    | with tail    | bb | 1.88 +/- 2.14 | 0.75 +/- 0.27 | 151 % | 0.17 | < 2.2e-16      | 50,00%         | 58,00%          | 58,00%                             | 47,00%   |       |       |
|                    |              | sc | 2.40 +/- 0.43 | 1.63 +/- 0.20 | 47 %  | 0.16 | < 2.2e-16      | 47,00%         | 47,00%          | 47,00%                             | 47,00%   |       |       |

Analysis was carried out for structures with and without the C-terminal tail and for backbone (bb) and side-chain atoms (sc), separately. The rmsd calculations are presented for the binding-site atoms (0.5 Å range) and the whole molecule (25 Å range).  $\delta$  value is defined as  $(\text{rmsd}_{0.5\text{Å}} - \text{rmsd}_{25\text{Å}})/\text{rmsd}_{25\text{Å}} \times 100\%$ . The median of the  $p$ -value distribution is presented for the binding site only (0.5 Å range). The average  $p$ -value (for pooled data) is given for the binding site only. The percentage of structures with  $p$ -value < 0.1 is given for four distance ranges from the binding site.
