# Supplementary material
Source: PubMed Central journal article supplement (PMC2780739)
Supplement: 0906966106_ST2_PDF.pdf [file 0906966106_ST2_PDF.pdf]

Table S2. PDB codes and chain names of structures from the analyzed ensemble of bound ubiquitin conformers

| PDB code | Ubiquitin | Binding partner |
|----------|-----------|-----------------|
| 1NBF     | C         | B               |
| 1AAR     | A         | B               |
| 1CMX     | B         | A               |
| 1P3Q     | V         | R,Q             |
| 1S1Q     | D         | C               |
| 1TBE     | A         | B               |
|          | B         | A               |
| 1UZX     | B         | A               |
| 1XD3     | B         | A               |
| 1YD8     | U         | H               |
| 2AYO     | B         | A               |
| 2C7M     | B         | A               |
| 2C7N     | J         | C               |
|          | H         | G               |
| 2D3G     | A         | P               |
|          | B         | P               |
| 2FCQ     | A         | B               |
| 2G45     | B         | A               |
